# Supplementary material for: Molecular Network-Based Drug Prediction in Thyroid Cancer
Source: MDPI journal article supplement (doi:10.3390/ijms20020263), 2019-01-11
Supplement: s1 [file s1]

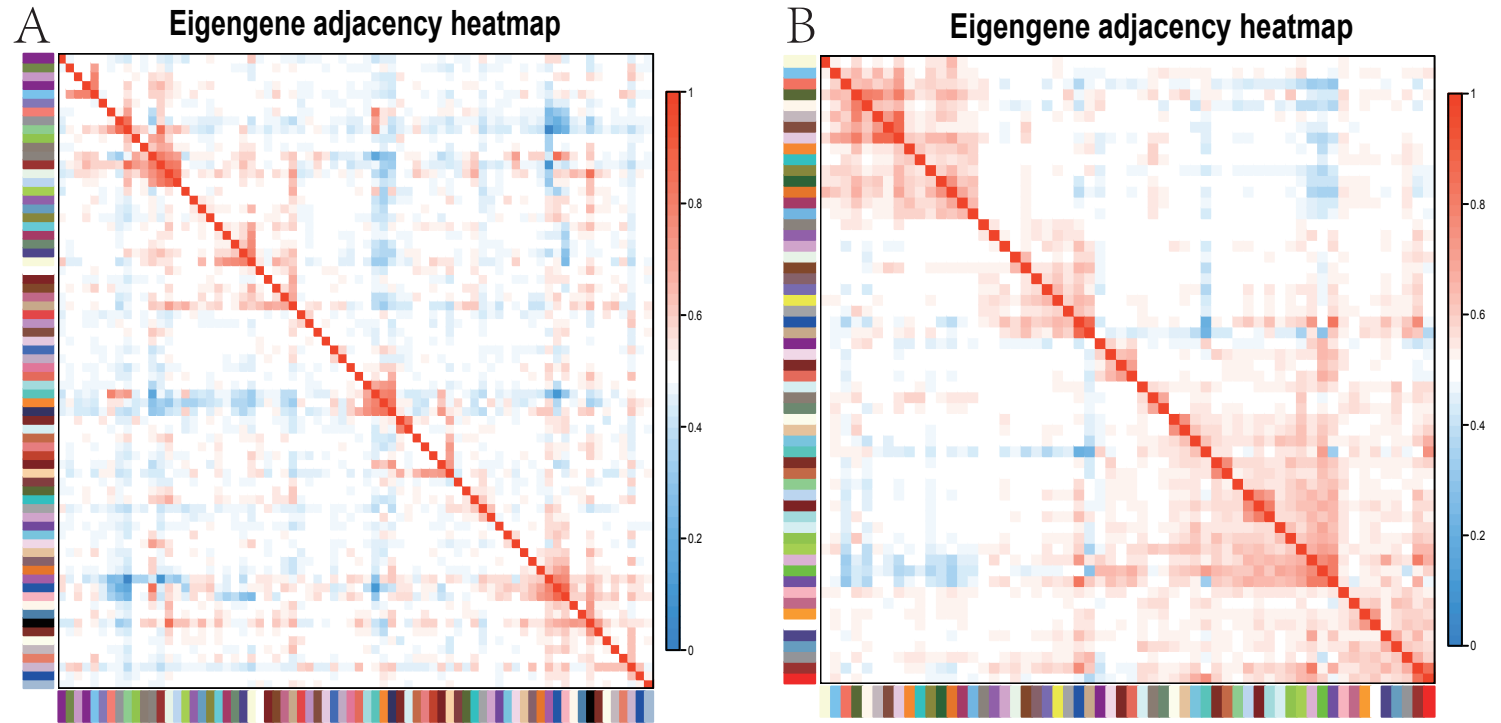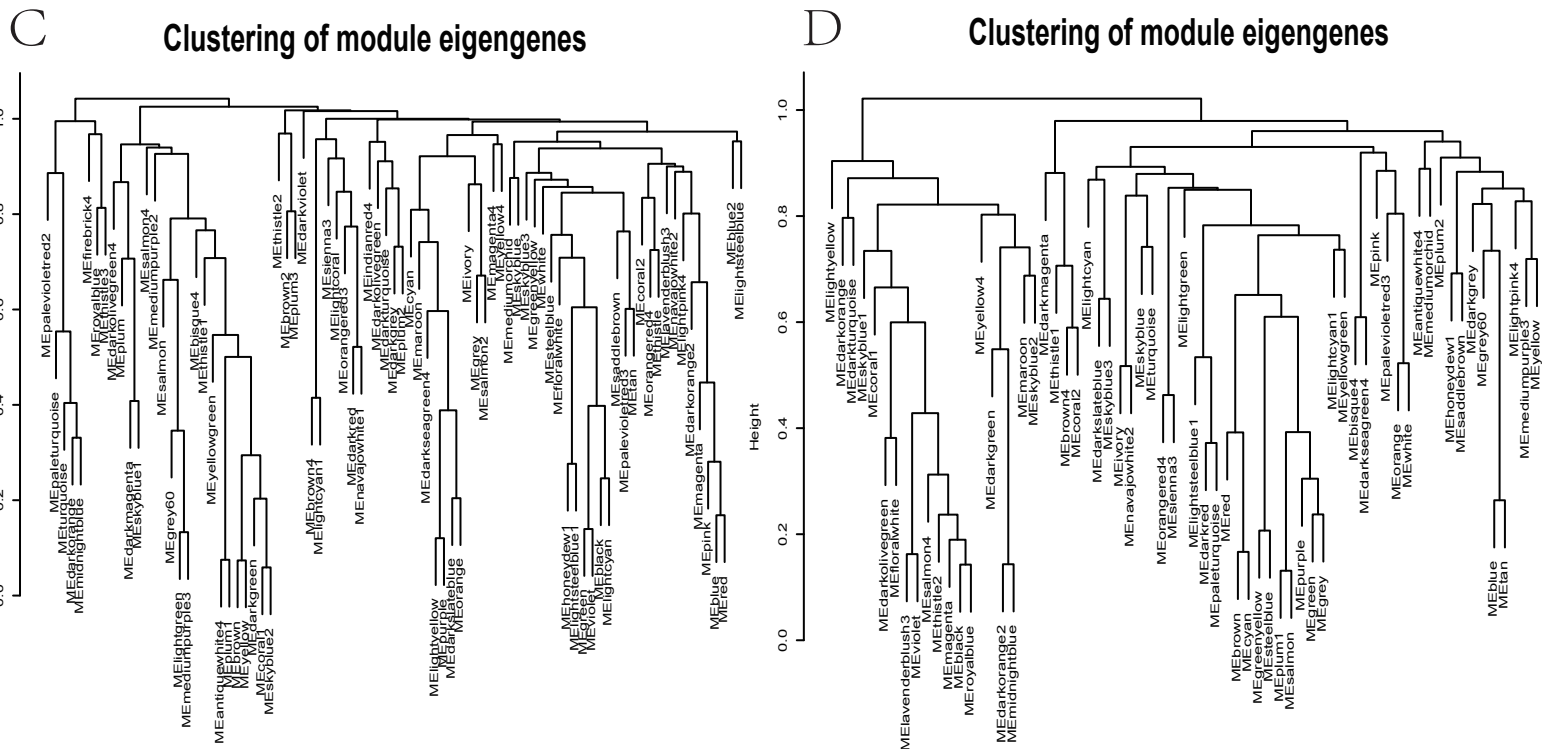

| E      | Module      | Gene number | Function                                              |
|--------|-------------|-------------|-------------------------------------------------------|
| Normal | Brown       | 4469        | GO:0006954~inflammatory response                      |
|        | Blue        | 4240        | GO:0043087~regulation of GTPase activity              |
|        | Turquoise   | 3850        | GO:0006412~translation                                |
|        | Black       | 3615        | GO:0008380~RNA splicing                               |
|        | Pink        | 1190        | GO:0006355~regulation of transcription, DNA-templated |
|        | magenta     | 906         | GO:0045165~cell fate commitment                       |
|        | greenyellow | 650         | GO:0007267~cell-cell signaling                        |
|        | tan         | 617         | GO:0042474~middle ear morphogenesis                   |
|        | salmon      | 582         | GO:0008584~male gonad development                     |
|        | cyan        | 511         | GO:1900034~regulation of cellular response to heat    |
| Tumor  | Turquoise   | 4346        | GO:0006351~transcription, DNA-templated               |
|        | Brown       | 2550        | GO:0006355~regulation of transcription, DNA-templated |
|        | Blue        | 2458        | GO:0070125~mitochondrial translational elongation     |
|        | Thistle2    | 1973        | GO:0006955~immune response                            |
|        | yellow      | 1854        | GO:0006334~nucleosome assembly                        |
|        | green       | 1396        | GO:0006099~tricarboxylic acid cycle                   |
|        | red         | 1343        | GO:0006351~transcription, DNA-templated               |
|        | pink        | 863         | GO:0007616~long-term memory                           |
|        | purple      | 674         | GO:0070125~mitochondrial translational elongation     |
|        | greenyellow | 618         | GO:0001525~angiogenesis                               |
